# Supplementary material for: Glucose-sensing glucagon-like peptide-1 receptor neurons in the dorsomedial hypothalamus regulate glucose metabolism
Source: PubMed Central journal article supplement — Sci Adv. 2022 Jun 8;8(23):eabn5345. doi: 10.1126/sciadv.abn5345 (PMC9177072; doi:10.1126/sciadv.abn5345), 2022-06-08
Supplement: sciadv.abn5345_sm.pdf [file sciadv.abn5345_sm.pdf]

Supplementary Materials for  
**Glucose-sensing glucagon-like peptide-1 receptor neurons in the dorsomedial  
hypothalamus regulate glucose metabolism**

Zhaohuan Huang *et al.*

Corresponding author: Ji Liu, geeliu6@gmail.com

*Sci. Adv.* **8**, eabn5345 (2022)  
DOI: 10.1126/sciadv.abn5345

**This PDF file includes:**

Figs. S1 to S6

Fig. S1.

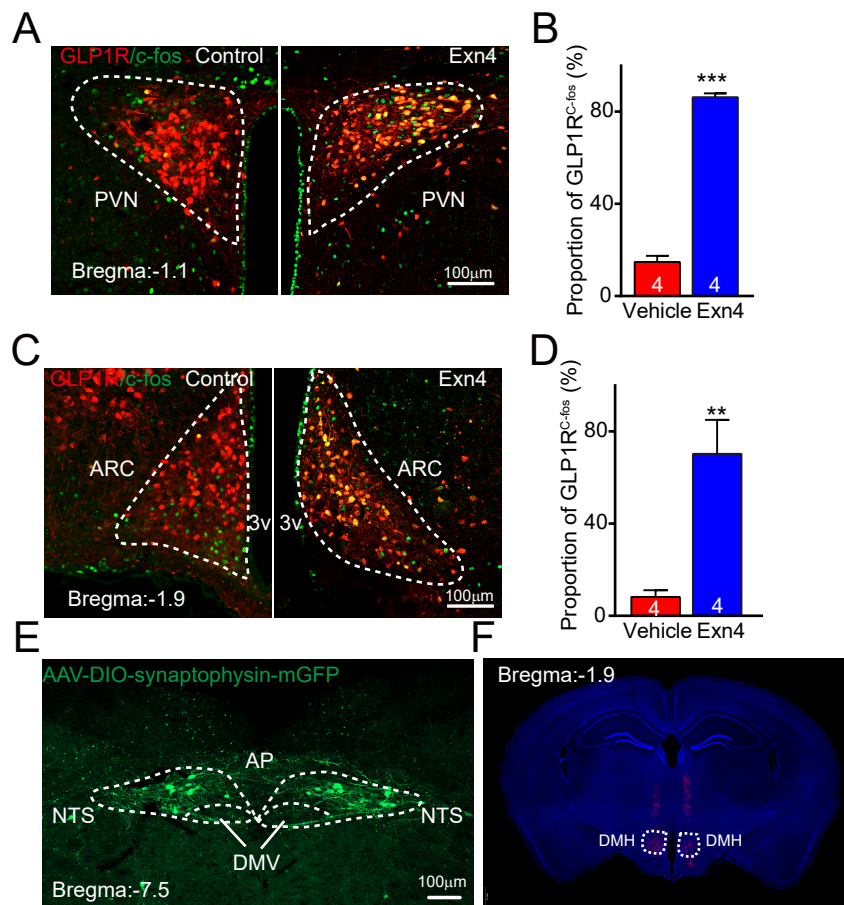

**Figure S1|** **A**, ICV Exn4 induced increased c-Fos expression in the GLP-1R neurons of paraventricular nucleus of hypothalamus (PVN) in the *GLP-1R-Cre* mice; **B**, Quantification of c-Fos positive cells ration (relative to total GLP-1R neurons), \*\*\* $p < 0.001$  (t-test); **C**, ICV Exn4 induced increased c-Fos expression in the GLP-1R neurons of arcuate nucleus (ARC) in the *GLP-1R-Cre* mice; **D**, Quantification of c-Fos positive cells ration (relative to total GLP-1R neurons), \*\* $p < 0.01$  (t-test); **E**, AAV-DIO-synaptophysin-mGFP mediated GFP expression in the NTS of *Gcg-Cre* mice. **F**, To verify the injection site for retro-AAV-DIO-GFP in the DMH of *Gcg-Cre* mice, we mixed with AAV-mCherry during injection, which was showed by the representative brain slice. n numbers are indicated in each panel.

Fig. S2.

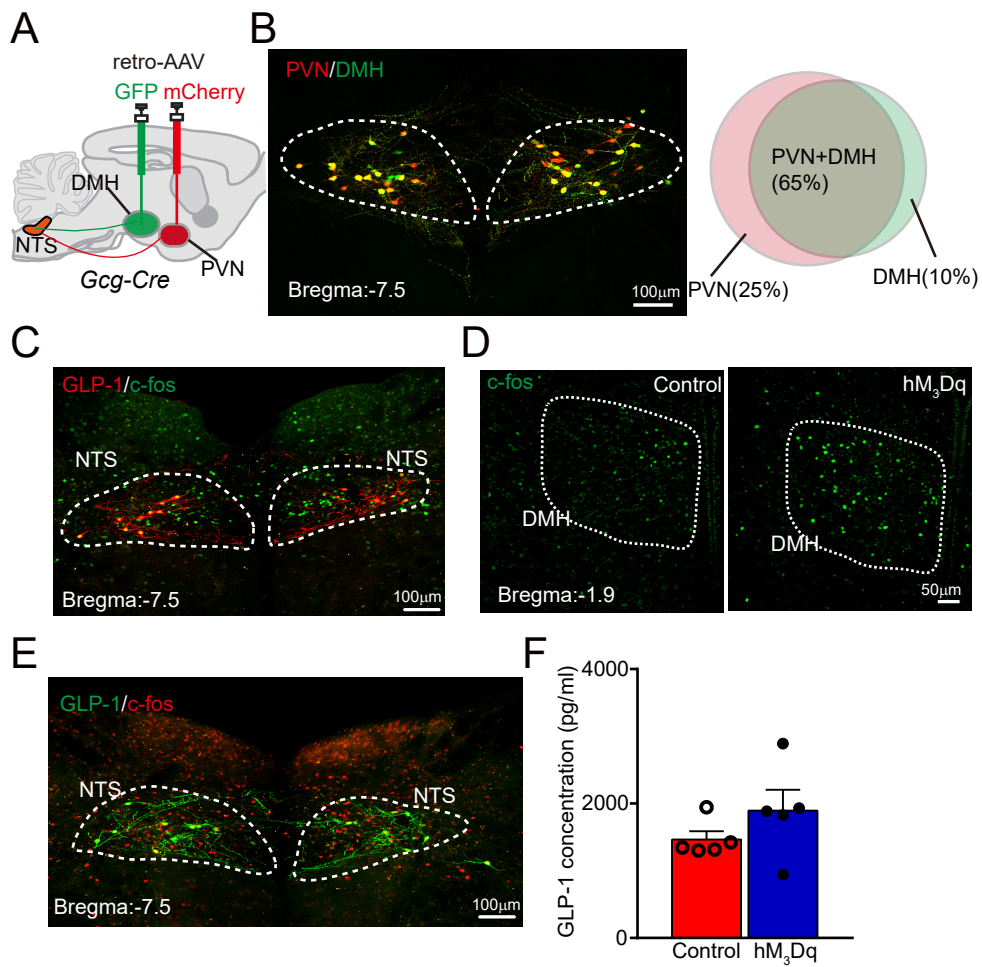

**Figure S2| A**, Experimental paradigm for retro-AAV viral injection in the PVN and DMH respectively of *Gcg-Cre* mice. **B**, Cre-dependent GFP expression in NTS demarks GLP-1 neurons which project to PVN (25%, mCherry), DMH (10%, GFP) and both PVN and DMH (65%, yellow). **C**, Cre-dependent hM3Dq expression in NTS of *Gcg-Cre* mice, which expressed c-fos after CNO injection. **D**, The representative image showed c-fos expression after chemogenetically activation of NTS GLP-1 neurons of *Gcg-Cre* mice. **E**, Cre-dependent retro-hM3Dq expression in NTS of *Gcg-Cre* mice, which expressed c-fos after CNO injection. **F**, GLP-1 concentration is showed in hM3Dq group than control group when chemogenetically activation of NTS GLP-1 neurons of *Gcg-Cre* mice ( $p > 0.05$ , t-test).

**Fig. S3.**

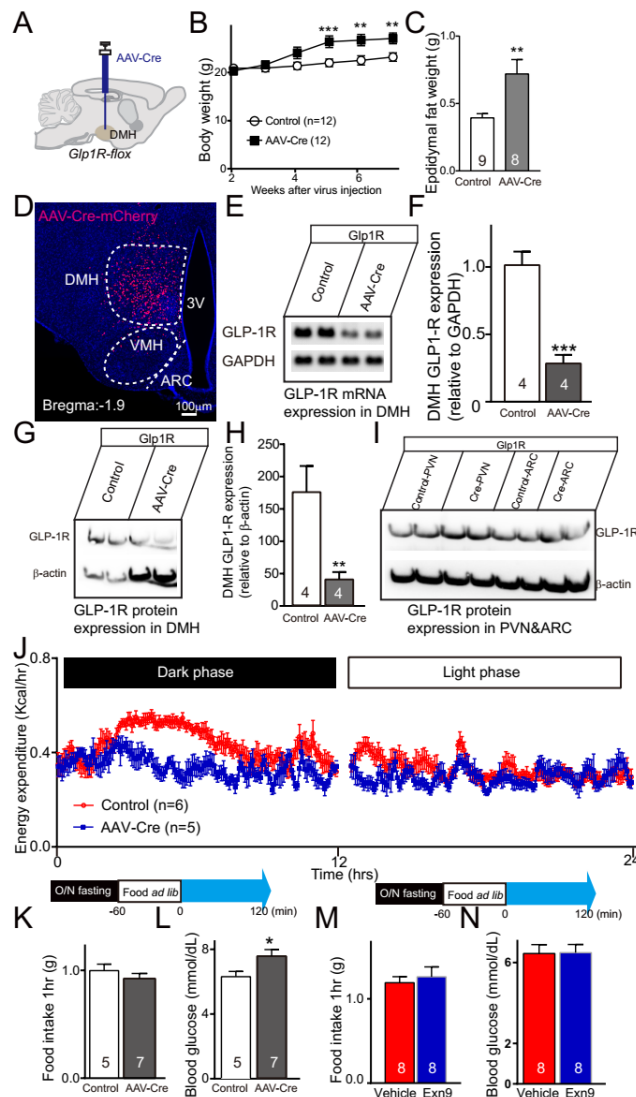

**Figure S3** **A**, Experimental paradigm for viral injection of AAV-Cre in *GLP1R<sup>fllox</sup>* mice; **B**, Body weight gain increased 5 weeks after depletion of DMH GLP-1R expression. \*\**p*<0.01, \*\*\**p*<0.001; **C**, Epididymal fat pad is heavier than control group, \*\* *p*<0.01 (t-test); **D**, AAV-Cre-mCherry virus expression pattern in the DMH in *GLP1R<sup>fllox</sup>* mice; **E**, DMH brain slices were harvested freshly and mRNA was extracted immediately after. By using the GLP-1R specific primers, we did the quantitative PCR to analyze the mRNA expression. The representative gel bands showed GLP-1R expression are lower in AAV-Cre group (right two lanes) when compared to control group (left two lanes). **F**, Q-PCR results confirmed the knockout of GLP-1R expression in DMH, \*\*\* *p*<0.001 (t-test); **G&H**, We further confirmed the GLP-1R protein expression in DMH by western-blot. \*\* *p*<0.01 (t-test); **I**, GLP-1R expression was not changed in the PVN and ARC after depletion GLP-1R in the DMH. **J**, Energy expenditure analysis indicated that GLP-1R depletion mice showed lower energy expenditure in the dark period; **K**, In the postprandial glucose experiment setup, 1hr food intake amount was measured. There's no difference between control group and GLP-1R depletion group. While the baseline glucose level (t=-60min) was higher in GLP-1R depletion group when compared to control. \**p*<0.05 (t-test) (**L**); Both 1hr food intake (t-test) (**M**) and baseline blood glucose level (t=-60min) (t-test) (**N**) were not different before Exn9 injection when investigating the GLP-1R antagonist-Exn9 effect on postprandial glucose (t-test).

Fig. S4.

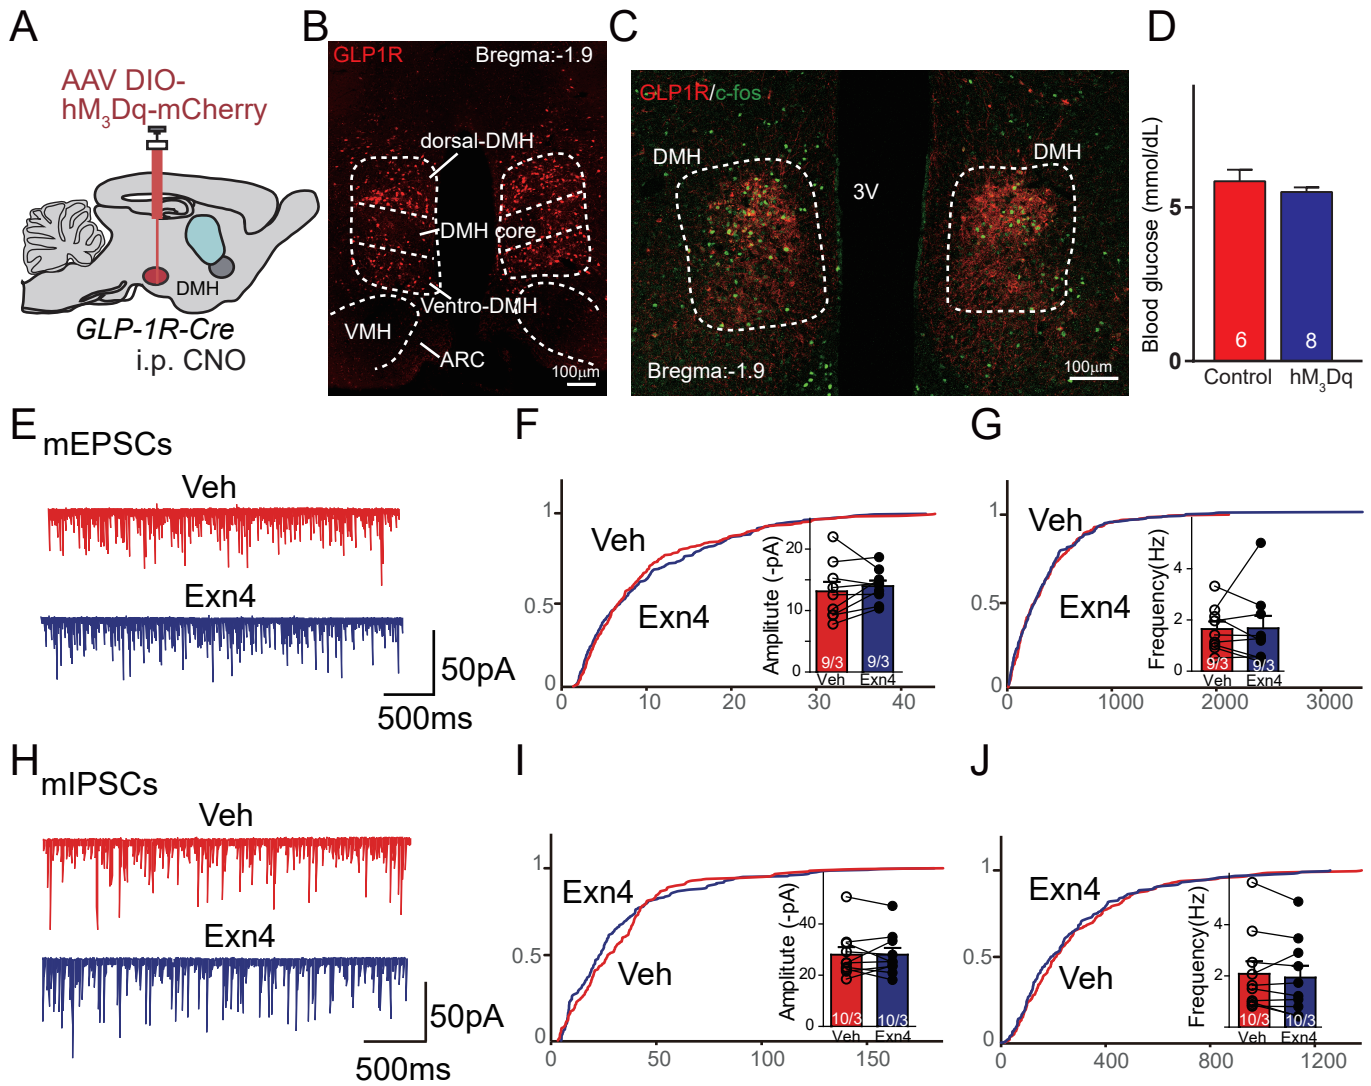

**Fig. S5.**

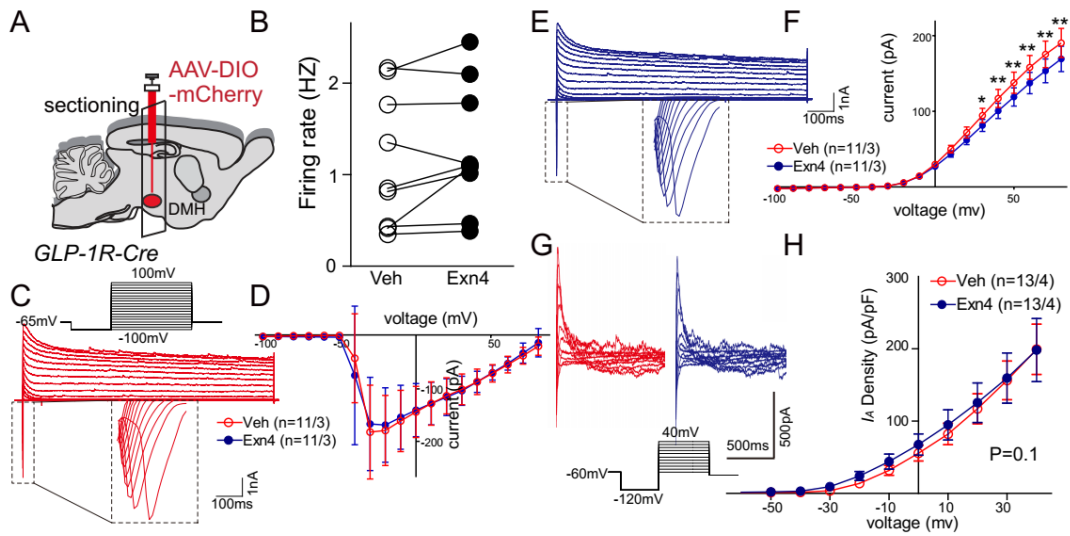

**Figure S5| A**, Experimental paradigm for recording GLP-1R positive neurons within DMH by injecting AAV-DIO-mCherry into *GLP-1R-Cre* mice; **B**, Action potential firing rate is not significantly changed when comparing vehicle group with Exn4 group.  $p > 0.05$  (paired t-test); **C&E**, Representative trace of voltage-step recording to isolate  $\text{Na}^+$  and  $\text{K}^+$  currents before and after treatment of GLP-1R agonist-Exn4; Exn4 did not alter voltage dependent sodium channel activity(**D**) but did change potassium channel activity (**F**)  $*p < 0.05$ ,  $**p < 0.01$  (repeat measurement, *post-hoc* pair-t-test); **G**, Representative trace and stimulation protocol for measurement of  $I_A$  before and after Exn4 treatment; **H**, I-V curve shows no significant shift after Exn4 treatment (repeat measurement, group effect  $p > 0.05$ , group x voltage effect  $p > 0.05$ );

Fig. S6.

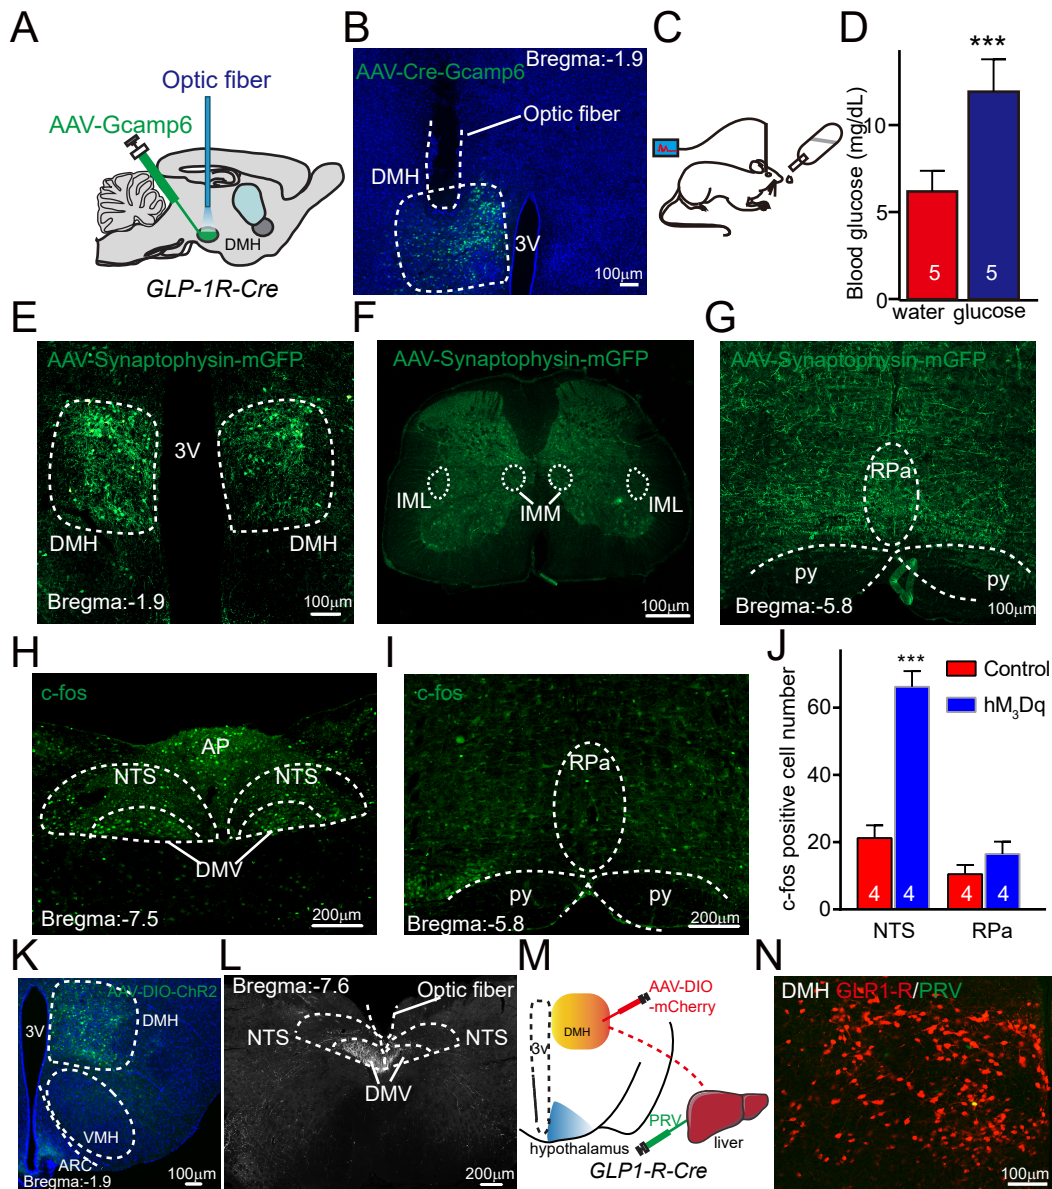

**Figure S6** | **A**, Experimental paradigm for investigation of in vivo  $Ca^{2+}$  image in the DMH of *GLP-1R-Cre* mice. **B**, The expression of GCaMP6 and location for optic fiber; **C**, Experimental paradigm for fiber photometry recording in DMH during glucose uptake in *GLP-1R-Cre* mice. **D**, Blood glucose levels were significantly increased after 5min glucose uptake.  $***p < 0.001$  (t-test) **E**, The expression of GFP after injection of AAV-DIO-synaptophysin-mGFP in DMH of *GLP-1R-Cre* mice; **F**, No *GLP-1R* afferents were observed in the IML region. **G**, Cre-dependent mGFP expression in the RPa originating from *GLP-1R* afferents. Chemogenetic stimulation of DMH *GLP-1R* neurons induced c-Fos expression in the NTS (**H**) and RPa (**I**) of *GLP-1R-Cre* mice. **J**, C-Fos positive cells are significantly higher in the NTS after CNO injection in the  $hM_3Dq$  group when compare to control animals (AAV-mCherry), but no in the RPa ( $***p < 0.001$ , t-test). **K**, Cre-dependent ChR2 expression in the DMH of *GLP-1R-Cre* mice. **L**, Location of optic fiber in the optogenetic experiment setup. **M**, Schematic showing fiber tracing of DMH *GLP-1R*+ neurons-liver projection: PRV-GFP and AAV-DIO-mCherry were injected into liver and DMH respectively in *GLP-1R-Cre* mice; **N**, Representative images showing *GLP-1R*+ neurons (red) and liver projecting neurons (green). Py: pyramidal tract; RPa: raphe pallidus nucleus; IML: intermedio-lateral nucleus; IMM: intermedio-medial nucleus
